# Supplementary material for: Predicting Taxi-Out Time at Congested Airports with Optimization-Based Support Vector Regression Methods
Source: Hindawi journal article supplement (doi:10.1155/2018/7509508), 2018-01-01
Supplement: f1 [file 7509508.f1.pdf]

## Appendix 1

**Table 1** Taxi-out times in test days

| 13 <sup>th</sup> (min) |    |    |    |    | 14 <sup>th</sup> (min) |    |    |    |    | 15 <sup>th</sup> (min) |    |    |    |    |
|------------------------|----|----|----|----|------------------------|----|----|----|----|------------------------|----|----|----|----|
| 9                      | 8  | 10 | 6  | 14 | 7                      | 13 | 14 | 18 | 8  | 12                     | 13 | 21 | 8  | 9  |
| 6                      | 10 | 7  | 7  | 14 | 9                      | 11 | 22 | 26 | 9  | 11                     | 35 | 9  | 13 | 36 |
| 5                      | 13 | 17 | 13 | 24 | 5                      | 15 | 11 | 19 | 29 | 3                      | 27 | 23 | 12 | 26 |
| 12                     | 25 | 22 | 7  | 28 | 7                      | 15 | 20 | 26 | 8  | 6                      | 19 | 17 | 5  | 34 |
| 4                      | 17 | 8  | 35 | 11 | 12                     | 12 | 16 | 21 | 14 | 9                      | 27 | 8  | 13 | 26 |
| 10                     | 24 | 30 | 8  | 14 | 6                      | 7  | 7  | 22 | 9  | 13                     | 25 | 28 | 15 | 10 |
| 6                      | 8  | 15 | 6  | 27 | 5                      | 5  | 10 | 8  | 14 | 10                     | 25 | 27 | 15 | 31 |
| 7                      | 15 | 16 | 24 | 21 | 5                      | 15 | 12 | 19 | 24 | 9                      | 9  | 26 | 5  | 33 |
| 8                      | 28 | 11 | 14 | 32 | 12                     | 8  | 11 | 16 | 4  | 11                     | 32 | 22 | 31 | 29 |
| 7                      | 27 | 9  | 24 | 13 | 14                     | 8  | 8  | 14 | 7  | 10                     | 31 | 10 | 12 | 27 |
| 8                      | 23 | 13 | 25 | 17 | 17                     | 17 | 7  | 12 | 13 | 12                     | 23 | 27 | 20 | 27 |
| 10                     | 19 | 3  | 7  | 18 | 12                     | 15 | 11 | 21 | 8  | 9                      | 24 | 15 | 28 | 30 |
| 9                      | 21 | 21 | 19 | 20 | 11                     | 13 | 16 | 8  | 13 | 7                      | 22 | 14 | 9  | 15 |
| 10                     | 27 | 13 | 22 | 42 | 13                     | 8  | 12 | 9  | 11 | 9                      | 22 | 13 | 8  | 21 |
| 12                     | 27 | 11 | 6  | 20 | 17                     | 8  | 12 | 17 | 4  | 10                     | 13 | 18 | 7  | 24 |
| 10                     | 19 | 13 | 12 | 34 | 9                      | 12 | 18 | 18 | 21 | 7                      | 11 | 14 | 37 | 23 |
| 18                     | 15 | 6  | 25 | 17 | 10                     | 15 | 5  | 28 | 20 | 3                      | 20 | 12 | 25 | 11 |
| 12                     | 18 | 13 | 14 | 25 | 13                     | 9  | 10 | 8  | 6  | 6                      | 17 | 15 | 20 | 11 |
| 15                     | 16 | 10 | 10 | 24 | 11                     | 13 | 12 | 23 | 5  | 7                      | 35 | 7  | 18 | 30 |
| 9                      | 33 | 10 | 16 | 9  | 10                     | 8  | 6  | 20 | 27 | 6                      | 23 | 15 | 10 | 21 |
| 10                     | 12 | 15 | 12 | 14 | 7                      | 20 | 17 | 15 | 21 | 10                     | 18 | 15 | 15 | 21 |
| 4                      | 19 | 12 | 24 | 21 | 7                      | 23 | 19 | 6  | 30 | 10                     | 30 | 13 | 13 | 26 |
| 3                      | 26 | 15 | 30 | 8  | 15                     | 12 | 21 | 31 | 5  | 7                      | 32 | 14 | 17 | 18 |
| 14                     | 19 | 4  | 16 | 13 | 12                     | 10 | 8  | 29 | 17 | 5                      | 36 | 8  | 6  | 7  |
| 13                     | 29 | 9  | 10 | 9  | 11                     | 22 | 17 | 16 | 16 | 10                     | 41 | 5  | 10 | 19 |
| 8                      | 20 | 14 | 40 | 16 | 6                      | 10 | 10 | 20 | 10 | 8                      | 23 | 17 | 34 | 11 |
| 14                     | 4  | 8  | 31 | 13 | 13                     | 21 | 9  | 9  | 9  | 12                     | 24 | 13 | 14 | 19 |
| 14                     | 14 | 17 | 34 | 30 | 11                     | 28 | 22 | 21 | 21 | 10                     | 18 | 14 | 16 | 19 |
| 14                     | 25 | 16 | 11 | 30 | 11                     | 8  | 4  | 22 | 9  | 10                     | 21 | 15 | 37 | 22 |
| 5                      | 23 | 12 | 31 | 20 | 9                      | 27 | 10 | 13 | 8  | 7                      | 17 | 26 | 42 | 25 |
| 11                     | 13 | 10 | 15 | 5  | 6                      | 22 | 4  | 17 | 25 | 8                      | 31 | 15 | 29 | 24 |
| 10                     | 12 | 7  | 11 | 11 | 9                      | 33 | 23 | 12 | 9  | 11                     | 35 | 27 | 34 | 25 |
| 5                      | 19 | 18 | 11 | 16 | 9                      | 25 | 23 | 18 | 10 | 9                      | 31 | 27 | 27 | 32 |
| 13                     | 30 | 10 | 36 | 12 | 8                      | 8  | 18 | 14 | 22 | 6                      | 35 | 25 | 20 | 23 |
| 9                      | 24 | 14 | 16 | 28 | 22                     | 22 | 15 | 10 | 25 | 8                      | 26 | 11 | 28 | 22 |
| 13                     | 14 | 9  | 27 | 9  | 18                     | 19 | 19 | 33 | 7  | 10                     | 26 | 30 | 30 | 21 |
| 7                      | 13 | 17 | 24 | 8  | 16                     | 30 | 12 | 19 | 23 | 8                      | 29 | 24 | 29 | 13 |
| 9                      | 19 | 12 | 21 | 6  | 11                     | 20 | 19 | 17 | 5  | 15                     | 23 | 34 | 17 | 24 |
| 5                      | 16 | 13 | 16 | 13 | 7                      | 12 | 11 | 9  | 14 | 6                      | 32 | 12 | 15 | 21 |
| 8                      | 15 | 24 | 12 | 15 | 9                      | 17 | 15 | 12 | 16 | 9                      | 25 | 39 | 11 | 11 |

|    |    |    |    |    |    |    |    |    |    |    |    |    |    |    |
|----|----|----|----|----|----|----|----|----|----|----|----|----|----|----|
| 11 | 15 | 17 | 27 | 15 | 14 | 18 | 10 | 10 | 16 | 10 | 35 | 32 | 16 | 28 |
| 4  | 3  | 12 | 33 | 7  | 9  | 8  | 15 | 29 | 5  | 10 | 20 | 10 | 13 | 15 |
| 19 | 19 | 12 | 13 | 10 | 10 | 20 | 9  | 19 | 6  | 5  | 22 | 21 | 10 | 20 |
| 10 | 8  | 10 | 12 | 9  | 19 | 20 | 19 | 18 | 9  | 9  | 36 | 33 | 9  | 17 |
| 9  | 10 | 21 | 25 | 17 | 17 | 20 | 9  | 18 | 13 | 6  | 12 | 18 | 12 | 18 |
| 5  | 18 | 10 | 14 | 11 | 9  | 33 | 9  | 19 | 11 | 10 | 25 | 23 | 9  | 23 |
| 10 | 8  | 10 | 23 | 10 | 7  | 4  | 10 | 23 | 18 | 9  | 37 | 22 | 16 | 10 |
| 24 | 14 | 14 | 15 | 6  | 12 | 34 | 7  | 10 | 13 | 18 | 43 | 18 | 10 | 13 |
| 11 | 6  | 11 | 15 | 14 | 6  | 4  | 10 | 10 | 10 | 9  | 28 | 34 | 16 | 8  |
| 10 | 20 | 15 | 15 | 6  | 15 | 22 | 12 | 18 | 17 | 26 | 33 | 33 | 22 | 8  |
| 13 | 14 | 15 | 12 | 9  | 15 | 21 | 6  | 8  | 4  | 40 | 40 | 28 | 15 | 11 |
| 5  | 12 | 15 | 20 | 10 | 7  | 19 | 9  | 17 | 18 | 10 | 33 | 18 | 18 | 20 |
| 8  | 6  | 8  | 11 | 7  | 9  | 13 | 8  | 20 | 13 | 24 | 30 | 25 | 12 | 16 |
| 18 | 10 | 21 | 25 | 43 | 7  | 13 | 11 | 16 | 17 | 18 | 23 | 33 | 12 | 5  |
| 10 | 24 | 31 | 13 | 13 | 27 | 24 | 10 | 10 | 6  | 20 | 27 | 30 | 11 | 12 |
| 14 | 5  | 34 | 13 | 35 | 25 | 19 | 20 | 15 | 17 | 5  | 30 | 25 | 14 | 7  |
| 10 | 9  | 22 | 22 | 23 | 4  | 16 | 11 | 14 | 11 | 16 | 22 | 31 | 15 | 9  |
| 18 | 34 | 10 | 8  | 10 | 14 | 22 | 20 | 34 | 6  | 9  | 22 | 13 | 26 | 10 |
| 11 | 33 | 30 | 27 | 16 | 6  | 13 | 18 | 36 | 4  | 16 | 29 | 34 | 21 | 8  |
| 7  | 6  | 10 | 33 | 15 | 17 | 26 | 11 | 16 | 5  | 26 | 38 | 27 | 18 | 4  |
| 7  | 4  | 27 | 8  | 14 | 14 | 14 | 14 | 6  | 9  | 6  | 40 | 19 | 9  | 12 |
| 12 | 5  | 11 | 22 | 16 | 10 | 18 | 17 | 19 | 15 | 27 | 15 | 20 | 12 | 9  |
| 9  | 24 | 31 | 15 | 41 | 9  | 11 | 6  | 16 | 10 | 15 | 12 | 26 | 10 | 9  |
| 18 | 20 | 32 | 25 | 30 | 8  | 12 | 15 | 8  | 4  | 26 | 8  | 19 | 22 | 12 |
| 13 | 21 | 9  | 34 | 11 | 20 | 6  | 17 | 12 | 11 | 18 | 33 | 28 | 15 | 12 |
| 17 | 10 | 8  | 7  | 7  | 9  | 17 | 10 | 19 | 16 | 34 | 10 | 27 | 9  | 8  |
| 8  | 16 | 8  | 13 | 17 | 16 | 14 | 11 | 22 | 14 | 15 | 14 | 17 | 12 | 15 |
| 23 | 13 | 10 | 11 | 55 | 10 | 17 | 13 | 11 | 13 | 18 | 15 | 30 | 9  | 15 |
| 14 | 29 | 32 | 5  | 8  | 6  | 17 | 27 | 8  | 18 | 20 | 6  | 40 | 8  | 15 |
| 4  | 12 | 29 | 31 | 16 | 12 | 12 | 11 | 23 | 11 | 37 | 21 | 16 | 9  | 12 |
| 11 | 8  | 26 | 33 | 15 | 7  | 8  | 9  | 17 | 10 | 41 | 8  | 28 | 10 | 17 |
| 11 | 5  | 34 | 25 | 7  | 4  | 23 | 14 | 18 | 23 | 13 | 8  | 22 | 16 | 22 |
| 14 | 17 | 23 | 14 | 9  | 16 | 21 | 19 | 19 | 4  | 42 | 32 | 30 | 24 | 9  |
| 16 | 24 | 23 | 16 | 7  | 13 | 9  | 13 | 18 | 10 | 33 | 35 | 36 | 33 | 10 |
| 8  | 20 | 8  | 31 | 16 | 15 | 12 | 30 | 19 | 16 | 31 | 6  | 15 | 17 | 11 |
| 8  | 23 | 30 | 6  | 12 | 16 | 6  | 19 | 13 | 10 | 30 | 35 | 32 | 23 | 17 |
| 15 | 24 | 32 | 24 | 14 | 8  | 10 | 17 | 17 | 22 | 19 | 9  | 44 | 32 | 26 |
| 15 | 18 | 7  | 14 | 14 | 5  | 15 | 15 | 16 | 17 | 21 | 7  | 20 | 34 | 14 |
| 17 | 21 | 19 | 22 | 6  | 15 | 22 | 14 | 26 | 15 | 23 | 17 | 14 | 28 | 8  |
| 14 | 13 | 8  | 22 | 14 | 11 | 14 | 16 | 10 | 13 | 26 | 23 | 37 | 19 | 10 |
| 5  | 8  | 15 | 17 | 5  | 9  | 15 | 17 | 21 | 10 | 32 | 9  | 26 | 13 | 25 |
| 4  | 13 | 21 | 21 | 22 | 12 | 14 | 7  | 6  | 9  | 18 | 12 | 22 | 35 | 22 |
| 9  | 16 | 14 | 21 | 11 | 10 | 5  | 14 | 27 | 11 | 23 | 28 | 23 | 30 | 15 |
| 6  | 31 | 12 | 20 | 8  | 14 | 8  | 14 | 21 | 13 | 24 | 7  | 22 | 14 | 13 |

|    |    |    |    |    |    |    |    |    |    |    |    |    |    |    |
|----|----|----|----|----|----|----|----|----|----|----|----|----|----|----|
| 5  | 12 | 7  | 22 | 18 | 9  | 17 | 7  | 24 | 4  | 20 | 16 | 39 | 34 | 14 |
| 9  | 13 | 19 | 9  | 16 | 15 | 22 | 12 | 6  | 15 | 13 | 4  | 22 | 11 | 12 |
| 13 | 8  | 14 | 10 | 8  | 11 | 5  | 13 | 7  | 7  | 28 | 15 | 6  | 38 | 20 |
| 11 | 15 | 11 | 16 | 5  | 16 | 22 | 9  | 4  | 17 | 15 | 13 | 22 | 25 | 20 |
| 8  | 17 | 19 | 14 | 4  | 12 | 20 | 7  | 10 | 9  | 19 | 23 | 12 | 29 | 14 |
| 13 | 15 | 8  | 15 | 19 | 19 | 15 | 19 | 6  | 13 | 22 | 15 | 35 | 28 | 13 |
| 20 | 22 | 10 | 20 | 15 | 21 | 8  | 14 | 24 | 16 | 29 | 17 | 18 | 26 | 12 |
| 7  | 16 | 5  | 24 | 11 | 10 | 15 | 9  | 18 | 9  | 21 | 22 | 6  | 25 | 14 |
| 12 | 15 | 22 | 33 | 10 | 7  | 31 | 15 | 19 | 16 | 34 | 24 | 13 | 27 | 10 |
| 13 | 15 | 12 | 15 | 13 | 11 | 13 | 13 | 15 | 17 | 25 | 18 | 12 | 35 |    |
| 6  | 20 | 21 | 13 | 6  | 5  | 8  | 18 | 25 |    | 29 | 13 | 15 | 11 |    |
| 9  | 8  | 11 | 12 | 17 | 18 | 11 | 6  | 19 |    | 26 | 13 | 15 | 35 |    |

**Table 2** Results of Wilcoxon-Mann-Whitney test for test days

|                  | Test on 13 <sup>th</sup> -14 <sup>th</sup> |          | Test on 13 <sup>th</sup> -15 <sup>th</sup> |          |
|------------------|--------------------------------------------|----------|--------------------------------------------|----------|
|                  | Group 1                                    | Group 2  | Group 1                                    | Group 2  |
| Numerosity       | 480                                        | 478      | 480                                        | 477      |
| Sum of Ranks (W) | 237605.0                                   | 221756.0 | 201812.0                                   | 256591.0 |
| Mean rank        | 495.0                                      | 463.9    | 420.4                                      | 537.9    |
| <i>p</i> -value  | 0.08126                                    |          | <0.00005                                   |          |
